# Supplementary material for: Misinformation effects in an online sample: results of an experimental study with a five day retention interval
Source: PeerJ. 2021 Nov 18;9:e12299. doi: 10.7717/peerj.12299 (PMC8606120; doi:10.7717/peerj.12299)
Supplement: Supplemental Information 1 [file peerj-09-12299-s001.xlsx]

## Sheet: Sheet1
Participant no.	Condition	Retention interval (days)	PreVivid	PreEmo	Attention 1	Attention 2	PostVivid	PercChangeVivid	PostEmo	PercChangeEmo
1	misinfo	5.50626	9	4	1	1	6	4	3	3
3	misinfo	5.50626	10	1	1	1	9	3		2
6	misinfo	9	9	7	1	1	5	3	5	4
8	misinfo	5.44373	8	0	1	1	6	4	5	3
10	misinfo	5.44373	7	2	1	1	7	3		2
11	misinfo	5.44373	10	7	1	1	10	3	1	3
15	misinfo	9	10	1	1	1	7	4	2	2
19	misinfo	5.44373	8	9	1	1	5	5	1	3
21	misinfo	5.44373	9	0	1	1	7	3	8
22	misinfo	5.44373	7	7	1	1	5	4	5	3
29	misinfo	5.44373	8	1	1	1	5	3	3	2
32	misinfo	5.44373	9	3	1	1	6	4	3	3
33	misinfo	5.44373	8	3	1	1	5	4	4	3
34	misinfo	5.44373	7	6	1	1	4	4	5	3
35	misinfo	5.44373	9	2	1	1	7	3	4	4
39	misinfo	5.44373	10	1	1	1	10	3	1	3
41	misinfo	6	10	7	1	1	6	4	3	4
44	misinfo	5.44373	9	10	1	1	7	4	8	3
50	misinfo	5.44373	7	2	1	1	6	4	4	3
52	misinfo	5.44373	10	0	1	1	6	4	1	3
53	misinfo	5.44373	8	5	1	1	7	5	5	3
54	misinfo	5.44373	9	2	1	1	8	4	1	3
55	misinfo	5.44373	7	1	1	1	8	4	3	3
56	misinfo	5.44373	7	1	1	1	5	4	2	3
58	misinfo	5.44373	8	2	1	1	7	4	3	3
59	misinfo	5.44373	8	0	1	1	4	5	3	3
62	misinfo	5.44373	8	3	1	1	8	3	6	4
64	misinfo	9	8	7	1	1	5	3	7	3
66	misinfo	5.44373	9	5	1	1	8	3	6	3
68	misinfo	7	7	0	1	1	7	4	1	3
72	misinfo	5.44373	9	1	1	1	5	4	2	3
76	misinfo	5.44373	7	0	1	1	7	4	0	3
77	misinfo	5.44373	8	5	1	1	6	3	4	3
81	misinfo	6	8	0	1	1	6	4	5	3
84	misinfo	5.44373	10	5	1	1	5	3	5	3
85	misinfo	5.44373	8	3	1	1	6	5	2	3
89	misinfo	5.44373	7	0	1	1	7	3	0	3
90	misinfo	5.44373	9	3	1	1	4	4	3	4
92	misinfo	5.44373	8	1	1	1	7	3	4	3
94	misinfo	5.44373	8	1	1	1	8	4	1	3
98	misinfo	5.44373	7	0	1	1	8	4	1	3
99	misinfo	5.44373	5	0	1	0		5	0
102	misinfo	5.44373	9	0	1	1	5	4	2	3
103	misinfo	5.44373	8	1	1	1	7	4	1	3
104	misinfo	9	10	0	1	1	8	4	4	4
105	misinfo	8	10	3	1	1	7	4	0	3
110	misinfo	5.44373	8	3	1	1	7	4	4	3
113	misinfo	5.44373	9	1	1	1	6	4	3	4
114	misinfo	6	10	0	1	1	7	3	0	3
116	misinfo	5.44373	8	6	1	1	6	5	5	3
118	misinfo	5.44373	6	0	0	1	6	4	1	1
122	misinfo	5.44373	9	7	1	1	7	4	4	3
123	misinfo	5.44373	6	4	1	1	3	4	5	3
2	control	4.61205	7	1	1	1	4	4	3	3
9	control	5.44373	4	10	1	1	2	5	4	2
13	control	5.44373	9	0	1	1	7	4	3	3
14	control	5.44373	9	0	1	1	7	4	8	2
17	control	7	10	4	1	0	8	4	4	3
18	control	9	5	0	1	1	6	4		3
20	control	5.44373	8	1	1	1	6	4	3	3
24	control	5.44373	7	0	1	1	7	3	3	3
27	control	5.44373	6	7	1	1	2	5	4	4
30	control	5.44373	9	0	1	1	7	4	3	3
31	control	5.44373	10	0	1	1	7	4	0	3
36	control	5.44373	6	0	1	1	3	5	3	3
38	control	5.44373	7	0	0	1	6	4	2	3
40	control	5.44373	8	2	1	0	6	4	2	2
42	control	5.44373	9	1	1	1	7	4	3	3
43	control	5.44373	8	6	1	1	7	4	4	3
45	control	9	5	6	1	0	4	4	5	2
48	control	5.44373	6	5	1	1	5	3	5	3
49	control	5.44373	7	7	1	1	6	4	4	3
57	control	5.44373	9	5	1	1	5	5	5	4
60	control	5.44373	8	7	1	1	6	5	2	3
61	control	5.44373	9	5	1	1	6	4	3	3
63	control	5.44373	7	0	1	1	6	4	1	3
67	control	5.44373	10	1	1	1	4	5	3	4
69	control	5.44373	9	8	1	1	7	4	3	3
70	control	7	8	5	1	1	5	4	4	3
78	control	5.44373	5	3	1	1	1	5	5	3
79	control	5.44373	6	2	1	1	6	3	2	2
80	control	5.44373	5	0	1	1	7	4	1	3
82	control	5.44373	9	2	1	1	10	3	2	2
83	control	5.44373	8	7	1	1	8	3	5	3
86	control	5.44373	8	1	1	1	9	3	3	4
87	control	5.44373	7	2	1	1	6	5	3	4
88	control	5.44373	8	9	1	0	6	4	5	4
93	control	5.44373	9	3	1	1	7	4	4	3
95	control	5.44373	8	1	1	1	6	4	3	1
100	control	5.44373	9	3	1	1	6	4	5	3
101	control	9	7	8	1	1	7	4	4	3
107	control	5.44373	9	0	1	1	6	3	0	1
109	control	5.44373	9	3	1	1	6	4	3	3
111	control	5.44373	8	1	1	1	5	4	1	3
115	control	5.44373	8	8	1	1	8	4	5	3
117	control	5.44373	6	3	1	1	7	3	3	3
119	control	5.44373	8	1	1	1	8	3	0	3
121	control	5.44373	8	2	1	1	4	5	2	3
124	control	5.44373	8	4	1	1	8	3	3	3
