# Supplementary material for: Misinformation effects in an online sample: results of an experimental study with a five day retention interval
Source: PeerJ. 2021 Nov 18;9:e12299. doi: 10.7717/peerj.12299 (PMC8606120; doi:10.7717/peerj.12299)
Supplement: Supplemental Information 2 [file peerj-09-12299-s002.xlsx]

## Sheet: Sheet1
Participant no.	Condition	True1	True2	True3	True4	True5	True6	True7	True8	True9	True10	True11	True12	Misinfo 1	Minsinfo 2	Misinfo 3	Minsinfo 4	Misinfo 5	Misinfo 6	Misinfo 7	Misinfo 8	Total True Items	Total Misinformation Items	Hits6	Hits5	Hits4	Hits3	Hits2	Hits1	False Alarms1	False Alarms2	False Alarms3	False Alarms4	False Alarms5	FalseAlarms6	0,0	H6	H5	H4	H3	H2	H1	0,0	FA6	FA5	FA4	FA3	FA2	FA1
1	misinfo	4	1	5	4	1	4	6	6	5	4	5	5	3	5	4	2	5	4	6	1	12	8	2	6	10	10	10	12	1	3	5	6	7	8	0	0.166667	0.5	0.833333	0.833333	0.833333	1	0	0.125	0.375	0.625	0.75	0.875	1
3	misinfo	5	1	6	5	5	6	6	3	6	6	6	6	4	6	6	4	6	6	5	1	12	8	7	10	10	11	11	12	4	5	7	7	7	8	0	0.583333	0.833333	0.833333	0.916667	0.916667	1	0	0.5	0.625	0.875	0.875	0.875	1
6	misinfo	3	1	4	5	5	5	6	6	4	4	6	6	3	3	3	1	6	1	5	4	12	8	4	7	10	11	11	12	1	2	3	6	6	8	0	0.333333	0.583333	0.833333	0.916667	0.916667	1	0	0.125	0.25	0.375	0.75	0.75	1
8	misinfo	6	1	6	4	6	2	5	6	6	4	6	6	6	6	4	4	6	4	2	1	12	8	7	8	10	10	11	12	3	3	6	6	7	8	0	0.583333	0.666667	0.833333	0.833333	0.916667	1	0	0.375	0.375	0.75	0.75	0.875	1
10	misinfo	5	4	5	6	6	5	5	1	6	3	6	6	3	5	4	4	6	4	6	1	12	8	5	9	10	11	11	12	2	3	6	7	7	8	0	0.416667	0.75	0.833333	0.916667	0.916667	1	0	0.25	0.375	0.75	0.875	0.875	1
11	misinfo	6	4	6	6	4	6	6	3	6	6	6	6	2	3	6	6	6	3	6	1	12	8	9	9	11	12	12	12	4	4	4	6	7	8	0	0.75	0.75	0.916667	1	1	1	0	0.5	0.5	0.5	0.75	0.875	1
15	misinfo	1	6	6	6	6	6	6	4	6	6	6	6	3	5	3	1	6	3	6	1	12	8	10	10	11	11	11	12	2	3	3	6	6	8	0	0.833333	0.833333	0.916667	0.916667	0.916667	1	0	0.25	0.375	0.375	0.75	0.75	1
19	misinfo	6	4	4	2	6	4	6	4	4	3	5	5	3	5	4	5	4	5	6	3	12	8	3	5	10	11	12	12	1	4	6	8	8	8	0	0.25	0.416667	0.833333	0.916667	1	1	0	0.125	0.5	0.75	1	1	1
21	misinfo	5	2	6	6	6	4	6	2	5	1	6	5	5	4	4	4	6	4	5	1	12	8	5	8	9	9	11	12	1	3	7	7	7	8	0	0.416667	0.666667	0.75	0.75	0.916667	1	0	0.125	0.375	0.875	0.875	0.875	1
22	misinfo	4	1	6	4	1	5	5	2	5	2	5	4	1	3	2	4	5	1	4	1	12	8	1	5	8	8	10	12	0	1	3	4	5	8	0	0.0833333	0.416667	0.666667	0.666667	0.833333	1	0	0	0.125	0.375	0.5	0.625	1
29	misinfo	6	6	6	6	6	5	6	6	6	6	5	2	4	1	5	6	6	5	3	5	12	8	9	11	11	11	12	12	2	5	6	7	7	8	0	0.75	0.916667	0.916667	0.916667	1	1	0	0.25	0.625	0.75	0.875	0.875	1
32	misinfo	5	6	6	3	6	4	6	2	5	5	6	6	4	5	3	4	5	4	6	1	12	8	6	9	10	11	12	12	1	3	6	7	7	8	0	0.5	0.75	0.833333	0.916667	1	1	0	0.125	0.375	0.75	0.875	0.875	1
33	misinfo	3	2	5	2	6	3	6	6	6	6	6	6	5	4	2	2	6	3	6	1	12	8	7	8	8	10	12	12	2	3	4	5	7	8	0	0.583333	0.666667	0.666667	0.833333	1	1	0	0.25	0.375	0.5	0.625	0.875	1
34	misinfo	2	4	2	6	6	5	6	4	6	3	6	6	5	6	4	4	6	3	6	5	12	8	6	7	9	10	12	12	3	5	7	8	8	8	0	0.5	0.583333	0.75	0.833333	1	1	0	0.375	0.625	0.875	1	1	1
35	misinfo	5	3	3	4	4	4	4	3	4	4	6	6	3	6	3	3	4	5	5	1	12	8	2	3	9	12	12	12	1	3	4	7	7	8	0	0.166667	0.25	0.75	1	1	1	0	0.125	0.375	0.5	0.875	0.875	1
39	misinfo	4	1	6	6	6	6	5	6	6	3	6	6	3	6	3	6	6	4	5	1	12	8	8	9	10	11	11	12	3	4	5	7	7	8	0	0.666667	0.75	0.833333	0.916667	0.916667	1	0	0.375	0.5	0.625	0.875	0.875	1
41	misinfo	4	5	6	3	6	4	6	3	6	4	6	5	3	5	3	4	6	3	1	1	12	8	5	7	10	12	12	12	1	2	3	6	6	8	0	0.416667	0.583333	0.833333	1	1	1	0	0.125	0.25	0.375	0.75	0.75	1
44	misinfo	5	2	1	4	6	5	5	1	5	5	6	5	3	2	4	2	5	4	4	1	12	8	2	8	9	9	10	12	0	1	4	5	7	8	0	0.166667	0.666667	0.75	0.75	0.833333	1	0	0	0.125	0.5	0.625	0.875	1
50	misinfo	4	4	6	4	5	4	6	3	5	3	6	6	3	5	3	3	5	5	5	1	12	8	4	6	10	12	12	12	0	4	4	7	7	8	0	0.333333	0.5	0.833333	1	1	1	0	0	0.5	0.5	0.875	0.875	1
52	misinfo	5	6	6	6	3	5	6	6	5	5	6	6	5	5	3	6	6	3	6	1	12	8	7	11	11	12	12	12	3	5	5	7	7	8	0	0.583333	0.916667	0.916667	1	1	1	0	0.375	0.625	0.625	0.875	0.875	1
53	misinfo	3	6	6	6	5	5	6	3	3	3	5	6	3	2	3	3	5	3	3	6	12	8	5	8	8	12	12	12	1	2	2	7	8	8	0	0.416667	0.666667	0.666667	1	1	1	0	0.125	0.25	0.25	0.875	1	1
54	misinfo	4	6	3	5	6	6	6	5	5	6	6	6	4	3	4	2	5	4	6	2	12	8	7	10	11	12	12	12	1	2	5	6	8	8	0	0.583333	0.833333	0.916667	1	1	1	0	0.125	0.25	0.625	0.75	1	1
55	misinfo	4	3	5	5	5	4	6	3	6	6	6	6	1	3	2	4	5	3	6	1	12	8	5	8	10	12	12	12	1	2	3	5	6	8	0	0.416667	0.666667	0.833333	1	1	1	0	0.125	0.25	0.375	0.625	0.75	1
56	misinfo	1	5	6	6	3	6	6	3	4	5	6	6	4	6	4	6	3	5	5	5	12	8	6	8	9	11	11	12	2	5	7	8	8	8	0	0.5	0.666667	0.75	0.916667	0.916667	1	0	0.25	0.625	0.875	1	1	1
58	misinfo	4	6	6	3	6	4	6	5	6	6	6	6	5	4	2	3	6	3	5	2	12	8	8	9	11	12	12	12	1	3	4	6	8	8	0	0.666667	0.75	0.916667	1	1	1	0	0.125	0.375	0.5	0.75	1	1
59	misinfo	4	5	5	4	4	4	6	4	4	6	6	6	3	4	4	4	4	4	6	1	12	8	4	6	12	12	12	12	1	1	6	7	7	8	0	0.333333	0.5	1	1	1	1	0	0.125	0.125	0.75	0.875	0.875	1
62	misinfo	2	6	4	2	4	4	5	3	4	5	6	5	3	5	3	4	4	4	6	1	12	8	2	5	9	10	12	12	1	2	5	7	7	8	0	0.166667	0.416667	0.75	0.833333	1	1	0	0.125	0.25	0.625	0.875	0.875	1
64	misinfo	6	6	5	6	5	3	4	5	4	4	6	5	3	5	5	3	6	2	6	1	12	8	4	8	11	12	12	12	2	4	4	6	7	8	0	0.333333	0.666667	0.916667	1	1	1	0	0.25	0.5	0.5	0.75	0.875	1
66	misinfo	6	3	6	3	6	3	5	4	6	5	5	6	3	5	6	6	5	6	6	1	12	8	5	8	9	12	12	12	4	6	6	7	7	8	0	0.416667	0.666667	0.75	1	1	1	0	0.5	0.75	0.75	0.875	0.875	1
68	misinfo	4	2	6	6	6	6	6	3	6	5	6	6	4	6	5	3	6	4	6	1	12	8	8	9	10	11	12	12	3	4	6	7	7	8	0	0.666667	0.75	0.833333	0.916667	1	1	0	0.375	0.5	0.75	0.875	0.875	1
72	misinfo	4	3	4	6	6	5	6	6	6	6	6	1	3	3	4	2	6	6	5	1	12	8	7	8	10	11	11	12	2	3	4	6	7	8	0	0.583333	0.666667	0.833333	0.916667	0.916667	1	0	0.25	0.375	0.5	0.75	0.875	1
76	misinfo	3	4	3	3	5	4	6	5	5	5	6	5	2	4	3	3	3	3	4	2	12	8	2	7	9	12	12	12	0	0	2	6	8	8	0	0.166667	0.583333	0.75	1	1	1	0	0	0	0.25	0.75	1	1
77	misinfo	5	6	5	3	5	3	3	3	2	5	6	4	2	2	3	2	5	3	2	1	12	8	2	6	7	11	12	12	0	1	1	3	7	8	0	0.166667	0.5	0.583333	0.916667	1	1	0	0	0.125	0.125	0.375	0.875	1
81	misinfo	6	6	6	3	6	6	6	1	6	1	6	6	3	5	5	6	6	4	6	4	12	8	9	9	9	10	10	12	3	5	7	8	8	8	0	0.75	0.75	0.75	0.833333	0.833333	1	0	0.375	0.625	0.875	1	1	1
84	misinfo	1	6	6	5	6	5	6	6	6	6	6	6	3	2	3	5	6	3	6	1	12	8	9	11	11	11	11	12	2	3	3	6	7	8	0	0.75	0.916667	0.916667	0.916667	0.916667	1	0	0.25	0.375	0.375	0.75	0.875	1
85	misinfo	4	6	5	4	6	6	6	4	6	3	5	4	4	2	4	5	3	2	3	2	12	8	5	7	11	12	12	12	0	1	3	5	8	8	0	0.416667	0.583333	0.916667	1	1	1	0	0	0.125	0.375	0.625	1	1
89	misinfo	5	6	3	4	5	4	6	3	5	6	5	6	3	4	4	3	5	4	6	1	12	8	4	8	10	12	12	12	1	2	5	7	7	8	0	0.333333	0.666667	0.833333	1	1	1	0	0.125	0.25	0.625	0.875	0.875	1
90	misinfo	5	1	6	4	6	4	6	4	5	6	6	5	3	5	4	2	5	2	3	1	12	8	5	8	11	11	11	12	0	2	3	5	7	8	0	0.416667	0.666667	0.916667	0.916667	0.916667	1	0	0	0.25	0.375	0.625	0.875	1
92	misinfo	5	6	6	6	6	4	6	6	6	3	6	6	3	2	4	2	6	4	1	1	12	8	9	10	11	12	12	12	1	1	3	4	6	8	0	0.75	0.833333	0.916667	1	1	1	0	0.125	0.125	0.375	0.5	0.75	1
94	misinfo	1	1	6	3	6	6	6	3	4	2	6	6	4	5	2	3	6	3	5	4	12	8	6	6	7	9	10	12	1	3	5	7	8	8	0	0.5	0.5	0.583333	0.75	0.833333	1	0	0.125	0.375	0.625	0.875	1	1
98	misinfo	5	6	6	3	6	5	6	4	6	5	6	4	6	3	3	4	6	5	5	1	12	8	6	9	11	12	12	12	2	4	5	7	7	8	0	0.5	0.75	0.916667	1	1	1	0	0.25	0.5	0.625	0.875	0.875	1
99	misinfo	6	1	6	6	6	6	4	6	6	6	4	1	6	6	6	6	3	2	1	4	12	8	8	8	10	10	10	12	4	4	5	6	7	8	0	0.666667	0.666667	0.833333	0.833333	0.833333	1	0	0.5	0.5	0.625	0.75	0.875	1
102	misinfo	4	6	6	4	6	4	6	6	5	6	6	6	3	5	3	2	5	3	6	1	12	8	8	9	12	12	12	12	1	3	3	6	7	8	0	0.666667	0.75	1	1	1	1	0	0.125	0.375	0.375	0.75	0.875	1
103	misinfo	2	6	1	6	6	6	6	6	4	6	6	6	1	1	2	6	6	6	6	1	12	8	9	9	10	10	11	12	4	4	4	4	5	8	0	0.75	0.75	0.833333	0.833333	0.916667	1	0	0.5	0.5	0.5	0.5	0.625	1
104	misinfo	3	1	5	2	4	4	4	4	5	4	6	5	1	1	2	4	4	1	2	1	12	8	1	4	9	10	11	12	0	0	2	2	4	8	0	0.0833333	0.333333	0.75	0.833333	0.916667	1	0	0	0	0.25	0.25	0.5	1
105	misinfo	3	4	6	4	3	4	6	5	4	6	6	6	3	3	4	4	3	3	2	1	12	8	5	6	10	12	12	12	0	0	2	6	7	8	0	0.416667	0.5	0.833333	1	1	1	0	0	0	0.25	0.75	0.875	1
110	misinfo	6	3	6	6	6	6	6	5	6	6	6	6	2	6	6	6	6	6	6	1	12	8	10	11	11	12	12	12	6	6	6	6	7	8	0	0.833333	0.916667	0.916667	1	1	1	0	0.75	0.75	0.75	0.75	0.875	1
113	misinfo	6	4	6	3	4	6	6	3	6	3	6	6	2	3	2	3	6	3	3	1	12	8	7	7	9	12	12	12	1	1	1	5	7	8	0	0.583333	0.583333	0.75	1	1	1	0	0.125	0.125	0.125	0.625	0.875	1
114	misinfo	4	6	6	6	6	6	6	6	6	6	6	6	1	5	3	5	6	3	5	1	12	8	11	11	12	12	12	12	1	4	4	6	6	8	0	0.916667	0.916667	1	1	1	1	0	0.125	0.5	0.5	0.75	0.75	1
116	misinfo	1	1	6	4	6	5	6	5	4	6	6	6	4	2	5	6	3	4	6	1	12	8	6	8	10	10	10	12	2	3	5	6	7	8	0	0.5	0.666667	0.833333	0.833333	0.833333	1	0	0.25	0.375	0.625	0.75	0.875	1
118	misinfo	2	6	5	5	4	2	6	1	6	6	6	6	2	3	5	4	6	6	6	1	12	8	6	8	9	9	11	12	3	4	5	6	7	8	0	0.5	0.666667	0.75	0.75	0.916667	1	0	0.375	0.5	0.625	0.75	0.875	1
122	misinfo	4	6	6	4	5	5	6	3	4	4	5	5	2	6	2	3	5	4	6	1	12	8	3	7	11	12	12	12	2	3	4	5	7	8	0	0.25	0.583333	0.916667	1	1	1	0	0.25	0.375	0.5	0.625	0.875	1
123	misinfo	4	3	3	4	3	4	5	5	5	5	6	5	3	3	4	3	5	3	3	1	12	8	1	6	9	12	12	12	0	1	2	7	7	8	0	0.0833333	0.5	0.75	1	1	1	0	0	0.125	0.25	0.875	0.875	1
2	control	3	5	2	5	3	4	6	6	6	6	6	6	5	2	5	3	6	3	3	1	12	8	6	8	9	11	12	12	1	3	3	6	7	8	0	0.5	0.666667	0.75	0.916667	1	1	0	0.125	0.375	0.375	0.75	0.875	1
9	control	3	5	6	6	5	4	5	3	6	6	6	6	2	4	3	5	6	3	4	1	12	8	6	9	10	12	12	12	1	2	4	6	7	8	0	0.5	0.75	0.833333	1	1	1	0	0.125	0.25	0.5	0.75	0.875	1
13	control	2	2	1	1	1	5	1	1	2	1	1	1	4	2	4	1	1	5	3	6	12	8	0	1	1	1	4	12	1	2	4	5	6	8	0	0	0.0833333	0.0833333	0.0833333	0.333333	1	0	0.125	0.25	0.5	0.625	0.75	1
14	control	2	6	6	5	3	5	5	6	6	6	6	6	4	2	5	5	6	2	5	1	12	8	7	10	10	11	12	12	1	4	5	5	7	8	0	0.583333	0.833333	0.833333	0.916667	1	1	0	0.125	0.5	0.625	0.625	0.875	1
17	control	3	4	2	6	5	4	4	5	5	4	4	3	4	2	2	1	4	2	5	3	12	8	1	4	9	11	12	12	0	1	3	4	7	8	0	0.0833333	0.333333	0.75	0.916667	1	1	0	0	0.125	0.375	0.5	0.875	1
18	control	3	6	5	5	6	5	3	2	4	5	6	5	3	4	4	5	6	3	4	1	12	8	3	8	9	11	12	12	1	2	5	7	7	8	0	0.25	0.666667	0.75	0.916667	1	1	0	0.125	0.25	0.625	0.875	0.875	1
20	control	5	6	6	6	6	2	6	3	6	5	6	5	5	3	3	2	5	3	5	1	12	8	7	10	10	11	12	12	0	3	3	6	7	8	0	0.583333	0.833333	0.833333	0.916667	1	1	0	0	0.375	0.375	0.75	0.875	1
24	control	1	6	1	2	5	3	5	5	6	6	6	6	1	1	1	4	6	1	4	1	12	8	5	8	8	9	10	12	1	1	3	3	3	8	0	0.416667	0.666667	0.666667	0.75	0.833333	1	0	0.125	0.125	0.375	0.375	0.375	1
27	control	4	5	5	2	5	6	5	5	6	6	2	4	3	5	4	1	6	3	2	1	12	8	3	8	10	10	12	12	1	2	3	5	6	8	0	0.25	0.666667	0.833333	0.833333	1	1	0	0.125	0.25	0.375	0.625	0.75	1
30	control	3	6	6	3	4	1	5	6	4	3	6	5	4	1	1	1	4	1	1	1	12	8	4	6	8	11	11	12	0	0	2	2	2	8	0	0.333333	0.5	0.666667	0.916667	0.916667	1	0	0	0	0.25	0.25	0.25	1
31	control	2	4	6	6	6	6	6	4	4	6	6	6	4	3	4	4	6	3	5	1	12	8	8	8	11	11	12	12	1	2	5	7	7	8	0	0.666667	0.666667	0.916667	0.916667	1	1	0	0.125	0.25	0.625	0.875	0.875	1
36	control	2	4	3	5	5	6	6	6	6	6	4	6	3	4	2	5	6	3	4	1	12	8	6	8	10	11	12	12	1	2	4	6	7	8	0	0.5	0.666667	0.833333	0.916667	1	1	0	0.125	0.25	0.5	0.75	0.875	1
38	control	2	6	5	5	6	2	6	2	4	4	6	2	4	2	2	5	5	3	5	1	12	8	4	6	8	8	12	12	0	3	4	5	7	8	0	0.333333	0.5	0.666667	0.666667	1	1	0	0	0.375	0.5	0.625	0.875	1
40	control	5	5	3	5	6	5	6	3	6	5	6	6	4	2	3	5	6	3	4	1	12	8	5	10	10	12	12	12	1	2	4	6	7	8	0	0.416667	0.833333	0.833333	1	1	1	0	0.125	0.25	0.5	0.75	0.875	1
42	control	2	6	5	4	5	5	6	4	2	4	6	5	2	2	3	2	6	3	1	1	12	8	3	7	10	10	12	12	1	1	1	3	6	8	0	0.25	0.583333	0.833333	0.833333	1	1	0	0.125	0.125	0.125	0.375	0.75	1
43	control	4	6	5	4	6	5	6	5	6	6	2	5	5	2	3	2	6	3	4	1	12	8	5	9	11	11	12	12	1	2	3	5	7	8	0	0.416667	0.75	0.916667	0.916667	1	1	0	0.125	0.25	0.375	0.625	0.875	1
45	control	3	4	2	5	6	5	6	3	6	5	5	3	2	2	3	5	6	3	5	3	12	8	3	7	8	11	12	12	1	3	3	6	8	8	0	0.25	0.583333	0.666667	0.916667	1	1	0	0.125	0.375	0.375	0.75	1	1
48	control	3	6	4	3	3	3	3	3	3	3	3	3	3	3	3	3	3	3	3	3	12	8	1	1	2	12	12	12	0	0	0	8	8	8	0	0.0833333	0.0833333	0.166667	1	1	1	0	0	0	0	1	1	1
49	control	4	5	5	4	3	4	5	5	5	5	4	4	5	3	2	3	4	3	2	3	12	8	0	6	11	12	12	12	0	1	2	6	8	8	0	0	0.5	0.916667	1	1	1	0	0	0.125	0.25	0.75	1	1
57	control	3	5	4	6	4	3	6	4	2	3	5	5	2	3	3	4	4	3	4	1	12	8	2	5	8	11	12	12	0	0	3	6	7	8	0	0.166667	0.416667	0.666667	0.916667	1	1	0	0	0	0.375	0.75	0.875	1
60	control	2	6	5	5	6	5	6	6	6	6	6	6	2	2	3	2	4	4	5	1	12	8	8	11	11	11	12	12	0	1	3	4	7	8	0	0.666667	0.916667	0.916667	0.916667	1	1	0	0	0.125	0.375	0.5	0.875	1
61	control	3	5	2	4	4	4	5	3	6	6	6	6	4	5	3	3	5	4	3	1	12	8	4	6	9	11	12	12	0	2	4	7	7	8	0	0.333333	0.5	0.75	0.916667	1	1	0	0	0.25	0.5	0.875	0.875	1
63	control	1	6	5	6	6	4	6	4	6	6	4	6	3	3	5	2	5	4	5	1	12	8	7	8	11	11	11	12	0	3	4	6	7	8	0	0.583333	0.666667	0.916667	0.916667	0.916667	1	0	0	0.375	0.5	0.75	0.875	1
67	control	4	6	4	3	5	4	6	4	5	5	6	6	2	4	5	4	5	3	5	1	12	8	4	7	11	12	12	12	0	3	5	6	7	8	0	0.333333	0.583333	0.916667	1	1	1	0	0	0.375	0.625	0.75	0.875	1
69	control	4	6	5	5	4	5	6	5	5	6	6	6	2	2	2	3	5	3	3	1	12	8	5	10	12	12	12	12	0	1	1	4	7	8	0	0.416667	0.833333	1	1	1	1	0	0	0.125	0.125	0.5	0.875	1
70	control	4	6	6	6	6	6	6	3	6	6	6	6	4	3	4	2	6	3	6	1	12	8	10	10	11	12	12	12	2	2	4	6	7	8	0	0.833333	0.833333	0.916667	1	1	1	0	0.25	0.25	0.5	0.75	0.875	1
78	control	2	6	4	4	4	4	5	4	2	4	5	4	3	3	2	3	4	3	2	2	12	8	1	3	10	10	12	12	0	0	1	5	8	8	0	0.0833333	0.25	0.833333	0.833333	1	1	0	0	0	0.125	0.625	1	1
79	control	4	4	6	3	5	4	6	3	6	5	6	5	2	2	2	3	6	3	2	1	12	8	4	7	10	12	12	12	1	1	1	3	7	8	0	0.333333	0.583333	0.833333	1	1	1	0	0.125	0.125	0.125	0.375	0.875	1
80	control	1	6	3	2	2	5	6	5	4	2	3	6	5	6	3	2	3	5	4	1	12	8	3	5	6	8	11	12	1	3	4	6	7	8	0	0.25	0.416667	0.5	0.666667	0.916667	1	0	0.125	0.375	0.5	0.75	0.875	1
82	control	2	6	6	4	2	4	6	2	5	2	6	6	2	2	2	5	2	2	6	1	12	8	5	6	8	8	12	12	1	2	2	2	7	8	0	0.416667	0.5	0.666667	0.666667	1	1	0	0.125	0.25	0.25	0.25	0.875	1
83	control	2	6	3	2	5	3	5	5	5	5	4	5	3	2	3	1	5	4	2	1	12	8	1	7	8	10	12	12	0	1	2	4	6	8	0	0.0833333	0.583333	0.666667	0.833333	1	1	0	0	0.125	0.25	0.5	0.75	1
86	control	4	6	6	6	6	3	6	4	6	6	6	1	6	2	1	1	2	3	6	1	12	8	8	8	10	11	11	12	2	2	2	3	5	8	0	0.666667	0.666667	0.833333	0.916667	0.916667	1	0	0.25	0.25	0.25	0.375	0.625	1
87	control	2	6	6	4	5	4	6	4	5	6	6	5	2	2	2	4	6	3	6	1	12	8	5	8	11	11	12	12	2	2	3	4	7	8	0	0.416667	0.666667	0.916667	0.916667	1	1	0	0.25	0.25	0.375	0.5	0.875	1
88	control	2	5	6	6	6	6	6	6	6	2	5	6	6	2	3	2	5	1	6	1	12	8	8	10	10	10	12	12	2	3	3	4	6	8	0	0.666667	0.833333	0.833333	0.833333	1	1	0	0.25	0.375	0.375	0.5	0.75	1
93	control	4	6	1	5	6	6	6	6	6	6	6	5	3	2	4	3	6	3	4	1	12	8	8	10	11	11	11	12	1	1	3	6	7	8	0	0.666667	0.833333	0.916667	0.916667	0.916667	1	0	0.125	0.125	0.375	0.75	0.875	1
95	control	4	6	6	6	6	4	6	6	5	6	6	6	3	2	3	6	3	3	6	1	12	8	9	10	12	12	12	12	2	2	2	6	7	8	0	0.75	0.833333	1	1	1	1	0	0.25	0.25	0.25	0.75	0.875	1
100	control	4	6	6	5	6	2	6	6	6	5	6	6	5	2	3	1	6	4	6	1	12	8	8	10	11	11	12	12	2	3	4	5	6	8	0	0.666667	0.833333	0.916667	0.916667	1	1	0	0.25	0.375	0.5	0.625	0.75	1
101	control	4	6	3	6	6	6	6	5	6	2	6	6	5	2	3	1	4	2	5	1	12	8	8	9	10	11	12	12	0	2	3	4	6	8	0	0.666667	0.75	0.833333	0.916667	1	1	0	0	0.25	0.375	0.5	0.75	1
107	control	4	6	6	5	5	4	2	5	6	6	4	5	5	3	5	4	6	3	2	1	12	8	4	8	11	11	12	12	1	3	4	6	7	8	0	0.333333	0.666667	0.916667	0.916667	1	1	0	0.125	0.375	0.5	0.75	0.875	1
109	control	2	5	1	5	4	3	6	4	5	5	3	4	2	2	2	3	6	2	4	1	12	8	1	5	8	10	11	12	1	1	2	3	7	8	0	0.0833333	0.416667	0.666667	0.833333	0.916667	1	0	0.125	0.125	0.25	0.375	0.875	1
111	control	3	6	5	6	6	4	6	6	6	6	6	6	2	5	3	6	6	4	5	1	12	8	9	10	11	12	12	12	2	4	5	6	7	8	0	0.75	0.833333	0.916667	1	1	1	0	0.25	0.5	0.625	0.75	0.875	1
115	control	6	6	6	6	6	6	6	6	6	6	6	6	1	1	6	1	6	1	6	1	12	8	12	12	12	12	12	12	3	3	3	3	3	8	0	1	1	1	1	1	1	0	0.375	0.375	0.375	0.375	0.375	1
117	control	3	6	4	5	5	3	6	3	5	4	6	3	2	5	3	4	4	3	2	1	12	8	3	6	8	12	12	12	0	1	3	5	7	8	0	0.25	0.5	0.666667	1	1	1	0	0	0.125	0.375	0.625	0.875	1
119	control	3	6	3	5	3	3	5	5	5	6	6	6	3	1	3	2	3	2	5	1	12	8	4	8	8	12	12	12	0	1	1	4	6	8	0	0.333333	0.666667	0.666667	1	1	1	0	0	0.125	0.125	0.5	0.75	1
121	control	2	6	3	5	6	4	6	6	4	6	6	5	4	2	2	3	2	2	4	1	12	8	6	8	10	11	12	12	0	0	2	3	7	8	0	0.5	0.666667	0.833333	0.916667	1	1	0	0	0	0.25	0.375	0.875	1
124	control	3	6	5	5	6	4	6	5	6	5	5	6	4	3	3	3	6	4	5	2	12	8	5	10	11	12	12	12	1	2	4	7	8	8	0	0.416667	0.833333	0.916667	1	1	1	0	0.125	0.25	0.5	0.875	1	1
[truncated: 12 more columns]
